# Supplementary material
Source: Springer Nature journal article supplement (https://www.springermedizin.de/resource/supplementary/12872_2007_28_MOESM2_ESM.pdf/9431160)

A

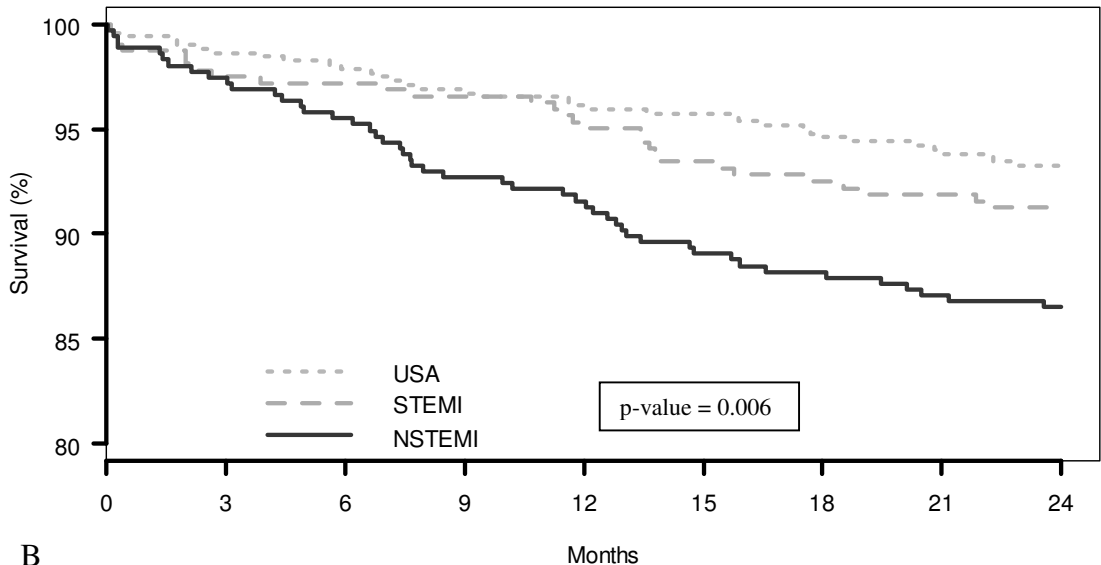

B

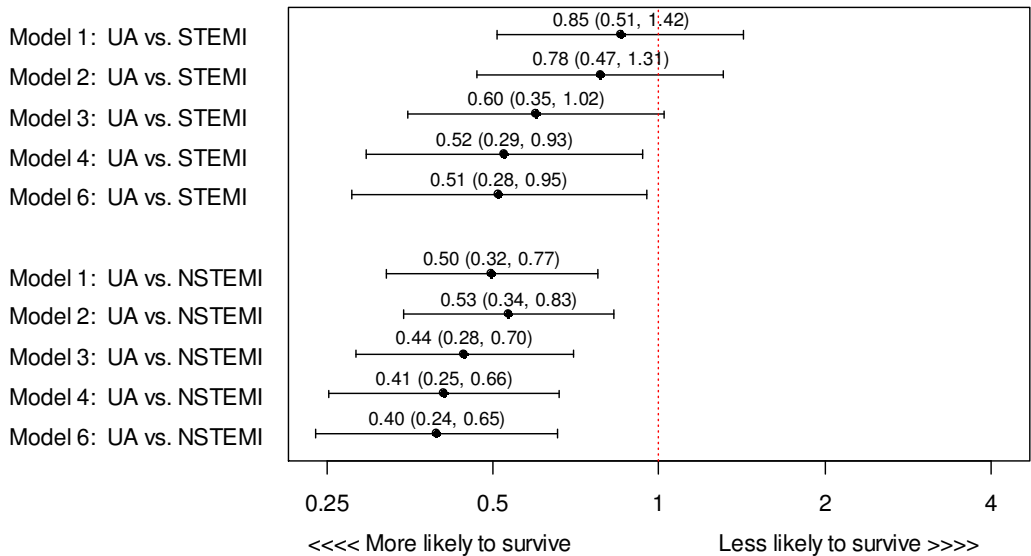

Supplement: MOESM2 [file 9431160]
